# Supplementary material for: Cultured rat aortic vascular smooth muscle cells do not express a functional TRPV1
Source: PubMed Central journal article supplement (PMC9928102; doi:10.1371/journal.pone.0281191), 2023-02-14

Fig 1A. mouse mAb against C-termini of TRPV1 (Abcam) exp1

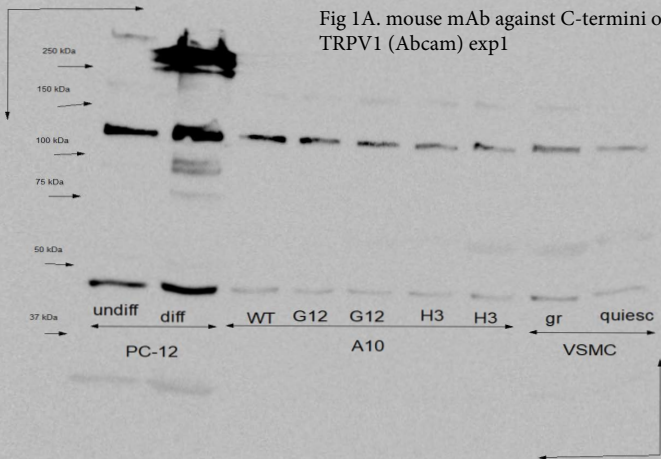

Fig 1A. Tubulin exp1  
(Abcam TRPV1)

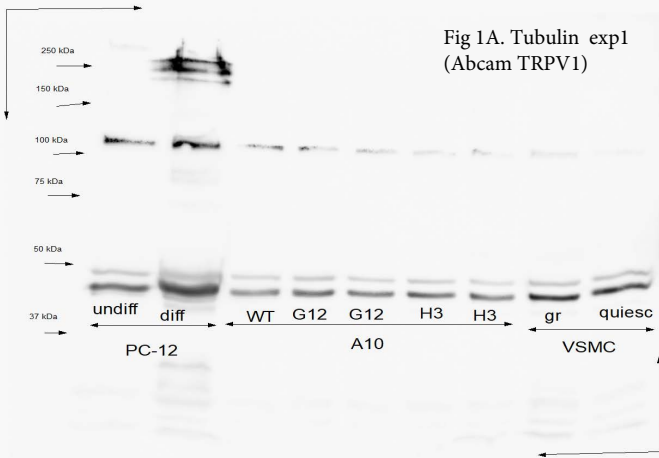

Fig 1A. rabbit pAb against N-termini of TRPV1 (Novus) exp1

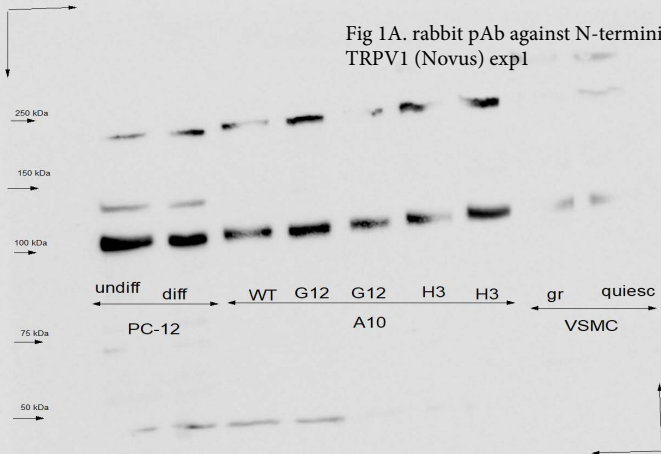

Fig 1A. Tubulin exp1 (Novus TRPV1)

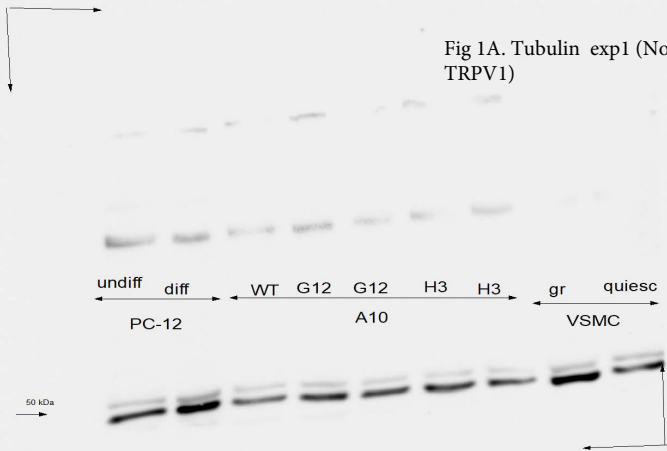

Fig 1A. rabbit pAb against  
N-termini of TRPV1  
(Novus) exp2

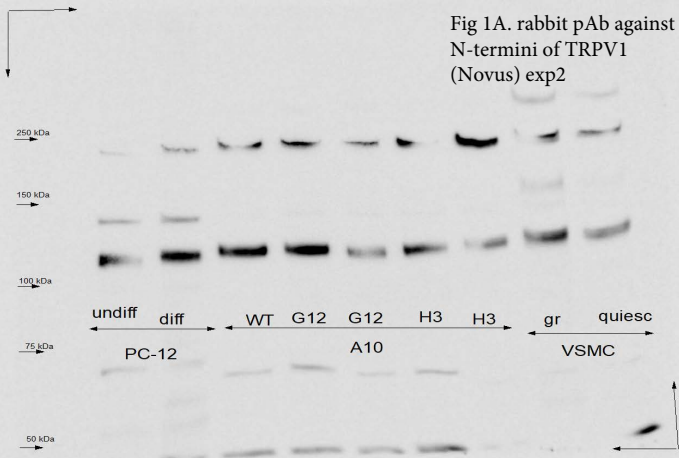

Fig 1A. Tubulin exp2 (Novus TRPV1)

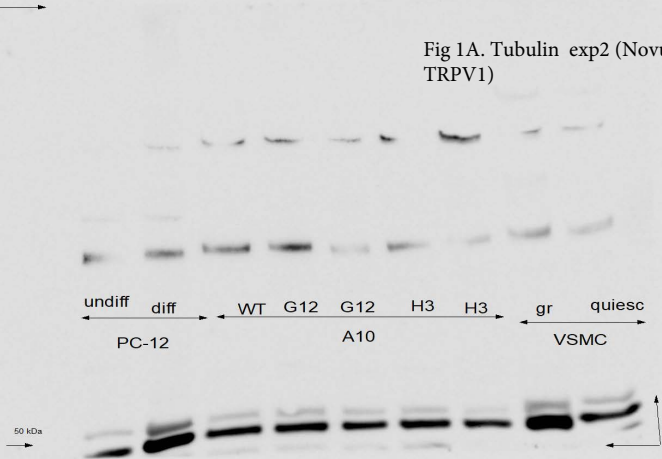

50 kDa

Fig 1A. mouse mAb against C-termini of TRPV1 (Abcam) exp2

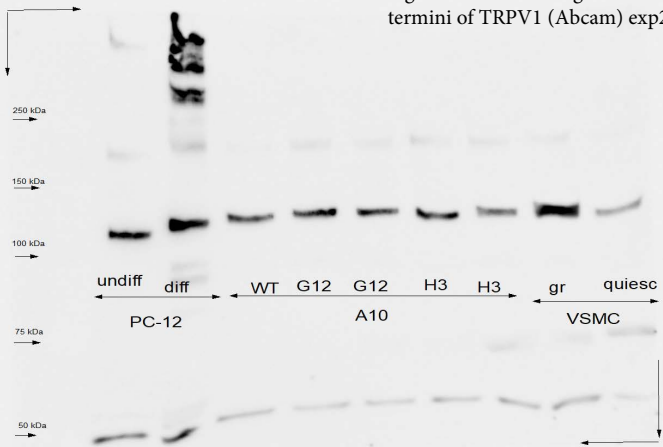

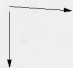

Fig 1A. Tubulin exp2 (Abcam TRPV1)

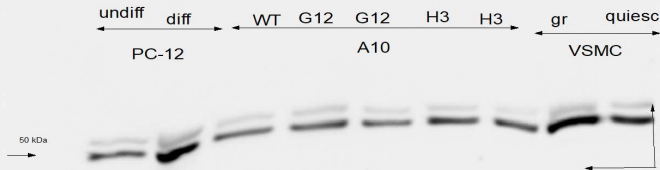



Fig 1A. mouse mAb against C-termini of TRPV1 (Abcam) exp3

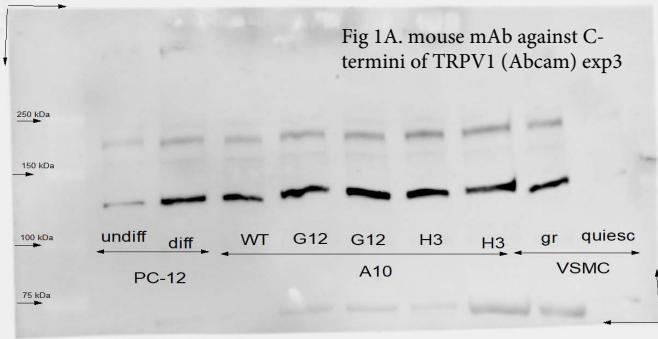

Fig 1A. Tubulin exp3  
(Abcam TRPV1)

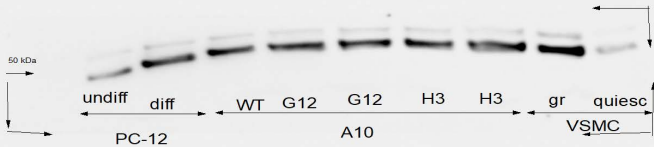

Fig 1A. rabbit pAb against N-termini of TRPV1 (Novus)  
exp3

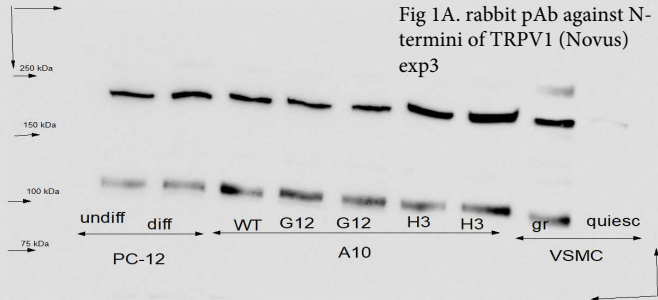

Fig 1A. Tubulin exp3  
(Novus TRPV1)

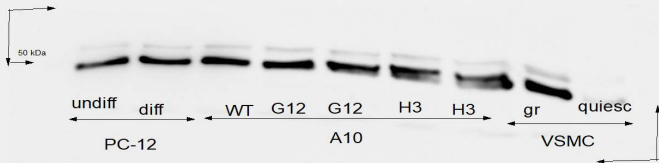

Fig 1B

pAb against N-termini of TRPV1  
(6% PAA gel) exp 1

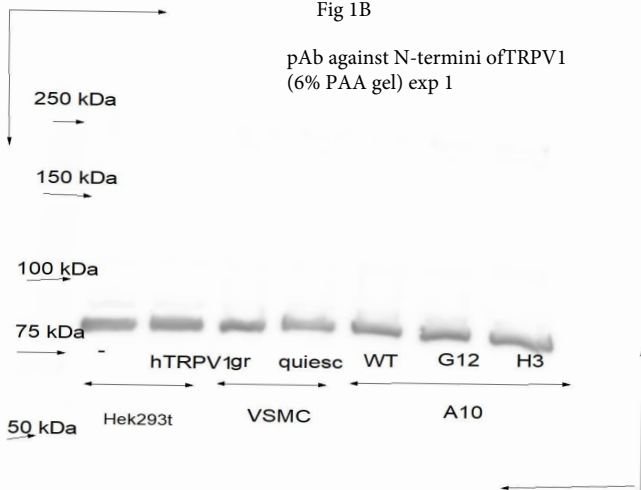

Fig 1B

tubulin (7.5% PAA gel) exp 1

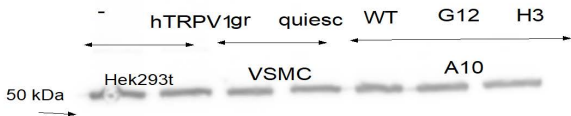

Fig 1B  
pAb against N-termini of TRPV1 (6%  
PAA gel) exp 2

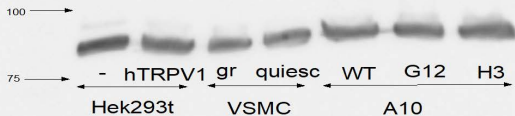

Fig 1B

tubulin (7.5% PAA gel) exp 2

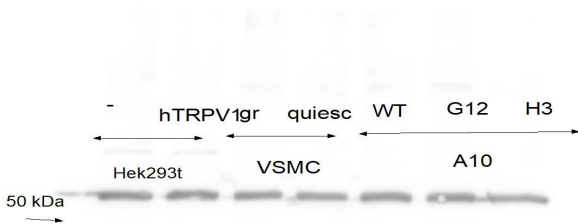



Fig 1B

pAb against N-termini  
of TRPV1 (6% PAA gel) exp 3

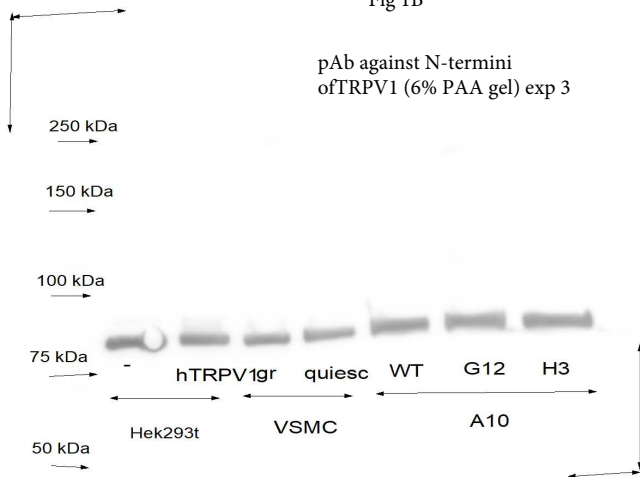

Fgi 1B

tubulin (7.5% PAA gel) exp 3

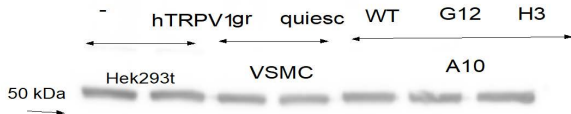

Fig 1B

pAb against N-termini of TRPV1  
(6% PAA gel) exp 4 - in the Fig 1B

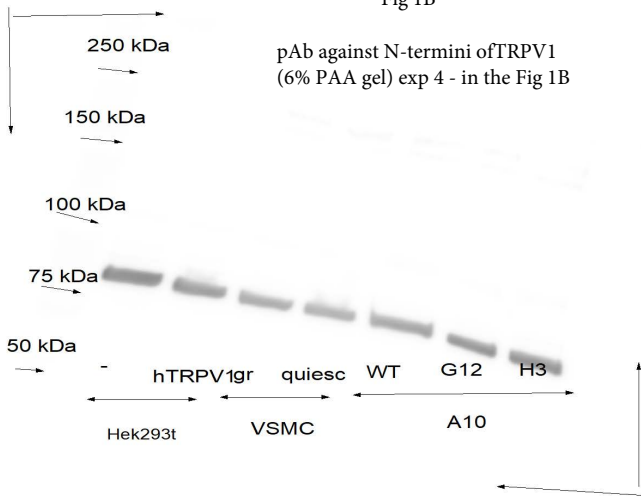

Fig 1B

tubulin (7.5% PAA gel) exp 4 -  
in the Fig 1B

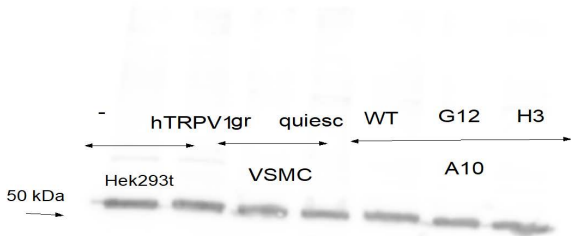

Supplement: pone.0281191.s005.pdf [file pone.0281191.s005.pdf]
